# Supplementary material
Source: MDPI journal article supplement (https://www.mdpi.com/2076-3417/14/1/19)
Supplement: s1 [file s1]

**- Supplementary Material -**

**Highlighting the terroir influence on the aromatic profile of two Romanian white wines**

**Diana Ionela Popescu (Stegarus)<sup>1,2</sup>, Oana Romina Botoran<sup>1,2</sup>, Roxana Elena Ionete<sup>1</sup>, Daniela Sandru<sup>3</sup>, Nicoleta Anca Sutan<sup>4</sup>, and Violeta-Carolina Niculescu<sup>1,\*</sup>**

<sup>1</sup>National Research and Development Institute for Cryogenic and Isotopic Technologies - ICSI Ramnicu Valcea, 4<sup>th</sup> Uzinei Street, P.O. Raureni, Box 7, 240050, Ramnicu Valcea, Romania

<sup>2</sup> Academy of Romanian Scientists, Splaiul Independentei 54, Bucharest, 050044, Romania

<sup>3</sup>Faculty of Agricultural Sciences, Food Industry and Environmental Protection, Lucian Blaga University of Sibiu, Dr. Ion Ratiu Street, No. 7-9, 550012, Sibiu, Romania

<sup>4</sup>Department of Natural Sciences, University of Pitesti, Targul din Vale 1, Pitesti, 110040, Romania

\*Correspondence: violeta.niculescu@icsi.ro

**Table S1.** Aroma compounds concentrations

| Aroma Compound          | Fa-Silagiu<br>(µg/L) | Fa-Aiud<br>(µg/L) | Fa-Sarica-Niculitel<br>(µg/L) | Fr- Silagiu<br>(µg/L) | Fr – Aiud<br>(µg/L) | Fr - Sarica-Niculitel<br>(µg/L) |
|-------------------------|----------------------|-------------------|-------------------------------|-----------------------|---------------------|---------------------------------|
| <b>Alcohols</b>         |                      |                   |                               |                       |                     |                                 |
| 1-heptanol              | 29.58±1.12           | 87.22±11.61       | 64.44±7.87                    | 124.22±12.84          | 195.07±15.23        | 207.84±12.14                    |
| 1-hexanol               | 312.05±14.02         | 244.32±12.02      | 341.24±11.55                  | 509.12±28.14          | 521.78±33.27        | 729.82±36.21                    |
| 2,3-butandiol           | 909.72±32.14         | 1009.48±18.51     | 657.99±24.91                  | 1214.12±37.26         | 1503.41±21.39       | 1343.52±36.21                   |
| 2-nonanol               | 41.77±2.54           | 39.39±3.08        | 62.5±4.14                     | 8.19±0.97             | 11.34±1.02          | 5.38±0.61                       |
| 2-pentanol              | 159.17±1.22          | 173.55±2.43       | 124.91±2.22                   | 153.44±1.67           | 98.32±5.21          | 111.39±4.22                     |
| 2-phenyl ethanol        | 8702.33±25.48        | 9112.74±19.12     | 7692.88±23.29                 | 9219.48±91.29         | 10001.43±88.71      | 11783.21±55.34                  |
| 3-methylthio-1-propanol | 91.69±8.23           | 133.22±7.91       | 113.41±8.88                   | 739.29±29.43          | 504.98±24.64        | 678.37± <b>31.36</b>            |
| benzyl alcohol          | 32.11±1.02           | 48.49±1.23        | 44.33±1.12                    | 68.11±6.06            | 83.52±3.12          | 57.51±1.75                      |
| e-3-hexenol             | 7.88±0.21            | 8.97±0.31         | 4.78±0.20                     | 16.35±1.38            | 18.26±2.06          | 10.02±1.24                      |
| isopentyl alcohol       | 9504.87±58.21        | 9691.44±39.72     | 8092.16±23.28                 | 9552.29±58.21         | 10036.72±40.16      | 8736.66±44.47                   |
| linalool                | 76.23±1.99           | 54.31±2.27        | 55.97±1.78                    | 117.91±10.16          | 118.11±4.81         | 105.42±12.39                    |
| beta-linalool           | 45.19±1.98           | 38.14±2.48        | 44.17±1.14                    | 74.13±5.17            | 68.94±2.21          | 55.13±8.39                      |
| n-amyl alcohol          | 222.31±5.29          | 265.44±3.27       | 318.37±4.19                   | 273±8.19              | 344.34±10.45        | 208.91±6.67                     |
| n-propanol              | 317.22±6.25          | 322.71±5.09       | 267.37±4.43                   | 324.33±7.34           | 409.14±11.21        | 317.88±8.53                     |
| terpineol               | 5.88±0.40            | 2.37±0.25         | 6.29±0.23                     | 167.11±18.54          | 172.29±27.31        | 124.38±21.92                    |

|                            |               |               |               |               |               |               |
|----------------------------|---------------|---------------|---------------|---------------|---------------|---------------|
| trans-geraniol             | 11.11±0.30    | 23.01±2.11    | 11.92±1.13    | 44.65±5.25    | 37.41±3.31    | 52.75±8.36    |
| Z-3-hexenol                | 10.89±0.28    | 10.11±1.98    | 12.39±1.90    | 9.43±1.95     | 10.1±2.04     | 10.29±2.32    |
| <b>Esters</b>              |               |               |               |               |               |               |
| diethyl succinate          | 945.5±41.15   | 1119.23±43.28 | 777.77±14.15  | 862.29±17.36  | 980.14±20.18  | 1200.17±25.24 |
| ethyl hexanoate            | 535.21±23.12  | 339.22±26.11  | 743.72±14.06  | 500.53±19.13  | 999.78±26.17  | 788.44±23.19  |
| ethyl butyrate             | 290.53±23.18  | 190.43±10.98  | 155.71±20.12  | 265.34±29.26  | 160.99±23.14  | 289.17±31.05  |
| ethyl decanoate            | 231.39±20.18  | 134.12±18.12  | 229.68±20.04  | 222.89±52.61  | 204.47±44.18  | 178.63±29.29  |
| methyl-4-hydroxy butanoate | 346.42±15.11  | 320.77±25.62  | 247.47±14.34  | 222.61±52.61  | 146.15±22.17  | 138.09±13.09  |
| ethyl octanoate            | 1057.34±22.35 | 888.38±20.53  | 991.37±21.14  | 1085.14±22.11 | 1171.29±22.84 | 903.88±33.12  |
| n-hexyl acetate            | 42.73±3.18    | 65.15±2.52    | 57.01±8.36    | 42.61±2.15    | 79.63±3.56    | 90.29±6.03    |
| 2-phenethyl acetate        | 143.28±14.12  | 138.6±8.16    | 145.33±10.03  | 127.25±11.13  | 135.27±10.42  | 139.34±19.16  |
| <b>Organic acids</b>       |               |               |               |               |               |               |
| butandioic acid            | 1833.65±33.83 | 1934.33±21.22 | 1729.88±27.03 | 1145.27±24.14 | 1137.82±22.19 | 1101.88±21.03 |
| butyric acid               | 9.79±1.49     | 15.36±2.35    | 23.28±1.23    | 10.05±1.16    | 8.14±0.88     | 7.69±1.11     |
| capric acid                | 1007.22±34.01 | 784.13±27.01  | 872.29±32.39  | 1087.23±22.39 | 852.81±32.14  | 949.84±33.17  |
| decanoic acid              | 529.47±25.81  | 602.24±29.98  | 302.39±27.27  | 420.23±33.11  | 501.22±34.13  | 610.09±24.12  |
| hexanoic acid              | 687.43±15.71  | 501.39±24.64  | 596.97±24.12  | 207.43±19.20  | 217.21±21.05  | 233.01±32.08  |
| isovaleric acid            | 367.22±13.67  | 272.81±11.66  | 461.25±10.62  | 516.44±14.12  | 685.11±17.08  | 610.27±15.15  |
| octanoic acid              | 1232.31±31.91 | 1400.14±35.35 | 1304.29±27.16 | 1338.19±66.39 | 1001.21±58.48 | 1407.37±62.02 |
| <b>Other compounds</b>     |               |               |               |               |               |               |
| eucalyptol                 | 35.12±5.07    | 41.05±7.15    | 37.07±4.12    | 36.16±3.15    | 34.08±2.67    | 41.08±4.03    |
| beta-citronellol           | 40.04±5.08    | 38.17±2.16    | 38.08±2.14    | 51.15±6.12    | 44.01±7.83    | 42.44±7.14    |
| acetal                     | 68.58±3.18    | 77.22±2.06    | 99.14±3.71    | 79.36±2.05    | 81.14±2.33    | 101.25±3.06   |
| furfural                   | 31.88±1.03    | 28.27±3.13    | 31.42±4.28    | 25.16±1.09    | 29.08±1.12    | 38.17±2.50    |
